# Supplementary material for: Apgar score and long-term respiratory morbidity of the offspring: a population-based cohort study with up to 18 years of follow-up
Source: Springer Nature journal article supplement (doi:10.1007/s00431-018-03311-6), 2019-01-09
Supplement: MOESM1 [file 16387632]

**Supplement table: Coding of respiratory morbidity diagnosis according to ICD-9**

| **Diagnosis Code** | **Diagnosis Description** | **Subgroup** |
| --- | --- | --- |
| 485 | BRONCHOPNEUMONIA, ORGANISM UNSPECIFIED | 1 |
| 486 | PNEUMONIA, ORGANISM UNSPECIFIED | 1 |
| 496 | CHRONIC AIRWAY OBSTRUCTION, NOT ELSEWHERE CLASSIFIED | 1 |
| 4939 | ASTHMA, UNSPECIFIED | 1 |
| 5060 | BRONCHITIS AND PNEUMONITIS DUE TO FUMES AND VAPORS | 1 |
| 49300 | EXTRINSIC ASTHMA, UNSPECIFIED | 1 |
| 49320 | CHR. OBSTRUCTIVE ASTHMA, UNSPECIFIED | 1 |
| 49321 | CHR. OSBTRUCTIVE ASTHMA WITH STATUS ASTHMATICUS | 1 |
| 49390 | ASTHMA,UNSPECIFIED | 1 |
| 49390 | ASTHMA,UNSPECIFIED TYPE,WITHOUT MENTION OF STATUS ASTHMATICUS | 1 |
| 49390 | ASTHMA,UNSPECIFIED TYPE,WITHOUT MENTION OF STATUS ASTHMATICUS OR ACUTE EXACERBATION OR UNSPECIFIED | 1 |
| 49391 | ASTHMA, UNSPECIFIED TYPE, WITH STATUS ASTHMATICUS | 1 |
| 49392 | UNSPECIFIED ASTHMA WITH (ACUTE) EXACERBATION | 1 |
| 49392 | UNSPECIFIED ASTHMA WITH ACUTE EXACERBATION | 1 |
| 51911 | ACUTE BRONCHOSPASM | 1 |
| 4920 | EMPHYSEMATOUS BLEB | 2 |
| 5100 | EMPYEMA WITH FISTULA | 2 |
| 5109 | EMPYEMA WITHOUT MENTION OF FISTULA | 2 |
| 5181 | INTERSTITIAL EMPHYSEMA | 2 |
| V4576 | ACQUIRED ABSENCE OF ORGAN, LUNG | 2 |
| 493 | ASTHMA | 3 |
| 494 | BRONCHIECTASIS | 3 |
| 515 | POSTINFLAMMATORY PULMONARY FIBROSIS | 3 |
| 4940 | BRONCHIECTESIS WITHOUT ACUTE EXACERBATION | 3 |
| 4941 | BRONCHIECTASIS WITH ACUTE EXACERBATION | 3 |
| 4959 | UNSPECIFIED ALLERGIC ALVEOLITIS AND PNEUMONITIS | 3 |
| 5160 | PULMONARY ALVEOLAR PROTEINOSIS | 3 |
| 5161 | IDIOPATHIC PULMONARY HEMOSIDEROSIS | 3 |
| 5183 | PULMONARY EOSINOPHILIA | 3 |
| 5070 | PNEUMONITIS DUE TO INHALATION (FOOD,VOMITUS,OR N.O.S.) | 4 |
| 5070 | PNEUMONITIS DUE TO INHALATION OF FOOD OR VOMITUS | 4 |
| 5071 | PNEUMONITIS DUE TO INHALATION OF OILS AND ESSENCES | 4 |
| 5078 | PNEUMONITIS DUE TO OTHER SOLIDS AND LIQUIDS | 4 |
| 5130 | ABSCESS OF LUNG | 4 |
| 5168 | OTHER SPECIFIED ALVEOLAR AND PARIETOALVEOLAR PNEUMONOPATHIES | 4 |
| 5192 | MEDIASTINITIS | 4 |
| 5193 | OTHER DISEASES OF MEDIASTINUM, NOT ELSEWHERE CLASSIFIED | 4 |
| 5194 | DISORDERS OF DIAPHRAGM | 4 |
| 5110 | PLEURISY WITHOUT MENTION OF EFFUSION OR CURRENT TUBERCULOSIS | 5 |
| 5118 | OTHER SPECIFIED FORMS OF PLEURAL EFFUSION, EXCEPT TUBERCULOUS | 5 |
| 5119 | UNSPECIFIED PLEURAL EFFUSION | 5 |
| 5120 | SPONTANEOUS TENSION PNEUMOTHORAX | 5 |
| 5128 | OTHER SPONTANEOUS PNEUMOTHORAX | 5 |
| 51181 | MALIGNANT PLEURAL EFFUSION | 5 |
| 51189 | OTHER SPECIFIED FORMS OF EFFUSION, EXCEPT TUBERCULOUS | 5 |
| 7990 | ASPHYXIA | 99 |
| 7990 | ASPHYXIA AND HYPOXEMIA | 99 |
| 7991 | RESPIRATORY FAILURE | 6 |
| 32723 | OBSTRUCTIVE SLEEP APNEA (ADULT)(PEDIATRIC) | 6 |
| 78057 | OTHER & UNSPECIFIED SLEEP APNEA | 6 |
| 78057 | OTHER AND UNSPECIFIED SLEEP APNEA | 6 |
| 78057 | UNSPECIFIED SLEEP APNEA | 6 |
| 79901 | ASPHYXIA | 99 |
| 514 | PULMONARY CONGESTION AND HYPOSTASIS | 99 |
| 518 | OTHER DISEASES OF LUNG | 99 |
| 786 | SYMPTOMS INVOLVING RESPIRATORY SYSTEM & OTHER CHEST SYMPTOMS | 99 |
| 4928 | OTHER EMPHYSEMA | 99 |
| 5178 | LUNG INVOLVEMENT IN OTHER DISEASES CLASSIFIED ELSEWHERE | 99 |
| 5180 | PULMONARY COLLAPSE | 99 |
| 5185 | PULMONARY INSUFFICIENCY FOLLOWING TRAUMA AND SURGERY | 99 |
| 5186 | ALLERGIC BRONCHOPULMONARY ASPERGILLOSIS | 99 |
| 5191 | OTHER DISEASES OF TRACHEA AND BRONCHUS,NOT ELSEWHERE CLASSIF. | 99 |
| 5198 | OTHER DISEASES OF RESPIRATORY SYSTEM, NOT ELSEWHERE CLASSIFIED | 99 |
| 5199 | UNSPECIFIED DISEASE OF RESPIRATORY SYSTEM | 99 |
| 9973 | RESPIRATORY COMPLICATIONS, NOT ELSEWHERE CLASSIFIED | 99 |
| 51883 | CHRONIC RESPIRATORY FAILURE | 99 |
| 51900 | TRACHEOSTOMY COMPLICATION, UNSP. | 99 |
| 51909 | OTHER TRACHEOSTOMY COMPLICATIONS | 99 |
| 51919 | OTHER DISEASES OF TRACHEA BRONCHUS | 99 |
| 78607 | WHEEZING | 99 |
| 78609 | OTHER DYSPNEA & RESPIRATORY ABNORMALITY | 99 |
| 78609 | OTHER DYSPNEA AND RESPIRATORY ABNORMALITY | 99 |
| 99739 | OTHER RESPIRATORY COMPLICATIONS | 99 |

| **SUB_Category_ID** | **SUB_Category_name** |
| --- | --- |
| 1 | asthma |
| 2 | structural-emphysema |
| 3 | bronchiectasis fibrosis siderosis |
| 4 | pneumonitis |
| 5 | pleural |
| 6 | OSA |
| 99 | OTHER |
